# Supplementary material for: Occurrence, Distribution, and Risk Assessment of Antibiotics in the Aquatic Environment of the Karst Plateau Wetland of Yangtze River Basin, Southwestern China
Source: MDPI journal article supplement (doi:10.3390/ijerph19127211), 2022-06-12
Supplement: s1 [file s1]

Table S1 The basic chemical information of 40 antibiotics in this study

| Types        | Analytes              | CAS      | Abbreviat<br>ion | Chemical formula                                                           | Molecular<br>Weight | Chemical Structure                                                                    |
|--------------|-----------------------|----------|------------------|----------------------------------------------------------------------------|---------------------|---------------------------------------------------------------------------------------|
| sulfonamides | sufaguanidine         | 57-67-0  | SG               | C <sub>7</sub> H <sub>10</sub> N <sub>4</sub> O <sub>2</sub> S             | 214.2               | 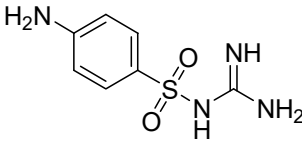   |
|              | sulfacetamide         | 144-80-9 | SCT              | C <sub>8</sub> H <sub>10</sub> N <sub>2</sub> O <sub>3</sub> S             | 214.2               |    |
|              | sulfadiazine          | 68-35-9  | SD               | C <sub>10</sub> H <sub>10</sub> N <sub>4</sub> O <sub>2</sub> S            | 250.3               |    |
|              | sulfathiazole         | 72-14-0  | ST               | C <sub>9</sub> H <sub>9</sub> N <sub>3</sub> O <sub>2</sub> S <sub>2</sub> | 255.3               |    |
|              | sulfapyridine         | 144-83-2 | SPD              | C <sub>11</sub> H <sub>11</sub> N <sub>3</sub> O <sub>2</sub> S            | 249.3               |  |
|              | sulfamerazine         | 127-79-7 | SMR              | C <sub>11</sub> H <sub>11</sub> N <sub>4</sub> NaO <sub>2</sub> S          | 286.3               |  |
|              | sulfameter            | 651-06-9 | SM               | C <sub>11</sub> H <sub>12</sub> N <sub>4</sub> O <sub>3</sub> S            | 280.3               |  |
|              | sulfamethazine        | 57-68-1  | SMZ              | C <sub>12</sub> H <sub>14</sub> N <sub>4</sub> O <sub>2</sub> S            | 278.3               |  |
|              | sulfachloropyridazine | 80-32-0  | SCP              | C <sub>10</sub> H <sub>9</sub> ClN <sub>4</sub> O <sub>2</sub> S           | 284.7               |  |

|                  |                        |             |      |                                                                              |        |  |
|------------------|------------------------|-------------|------|------------------------------------------------------------------------------|--------|--|
|                  | sulfamonomethoxine     | 1220-83-3   | SMM  | C <sub>11</sub> H <sub>12</sub> N <sub>4</sub> O <sub>3</sub> S              | 280.3  |  |
|                  | sulfamethoxazole       | 723-46-6    | SMX  | C <sub>10</sub> H <sub>11</sub> N <sub>3</sub> O <sub>3</sub> S              | 253.3  |  |
|                  | sulfisoxazole          | 127-69-5    | SIZ  | C <sub>11</sub> H <sub>13</sub> N <sub>3</sub> O <sub>3</sub> S              | 267.3  |  |
|                  | acetylsulfamethoxazole | 21312-10-7  | ASMZ | C <sub>12</sub> H <sub>13</sub> N <sub>3</sub> O <sub>4</sub> S              | 295.3  |  |
|                  | sulfadoxine            | 2447-57-6   | SDO  | C <sub>12</sub> H <sub>14</sub> N <sub>4</sub> O <sub>4</sub> S              | 310.3  |  |
|                  | sulfadimethoxine       | 122-11-2    | SSS  | C <sub>12</sub> H <sub>14</sub> N <sub>4</sub> O <sub>4</sub> S              | 310.3  |  |
| Fluoroquinolones | marbofloxacin          | 115550-35-1 | MAR  | C <sub>17</sub> H <sub>19</sub> FN <sub>4</sub> O <sub>4</sub>               | 362.4  |  |
|                  | fleroxacin             | 79660-72-3  | FLE  | C <sub>17</sub> H <sub>18</sub> F <sub>3</sub> N <sub>3</sub> O <sub>3</sub> | 369.34 |  |
|                  | ofloxacin              | 82419-36-1  | OFL  | C <sub>18</sub> H <sub>20</sub> FN <sub>3</sub> O <sub>4</sub>               | 361.3  |  |

|               |                 |             |     |                         |       |                                                                                       |
|---------------|-----------------|-------------|-----|-------------------------|-------|---------------------------------------------------------------------------------------|
|               |                 |             |     |                         |       | 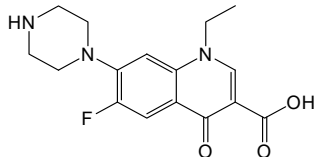   |
|               | norfloxacin     | 70458-96-7  | NOR | $C_{16}H_{18}FN_3O_3$   | 319.3 |                                                                                       |
|               |                 |             |     |                         |       |    |
|               | pefloxacin      | 70458-92-3  | PEF | $C_{17}H_{20}FN_3O_3$   | 333.4 |                                                                                       |
|               |                 |             |     |                         |       |    |
|               | ciprofloxacin   | 85721-33-1  | CIP | $C_{17}H_{18}FN_3O_3$   | 331.3 |                                                                                       |
|               |                 |             |     |                         |       |    |
|               | danofloxacin    | 112398-08-0 | DAN | $C_{19}H_{20}FN_3O_3$   | 357.4 |                                                                                       |
|               |                 |             |     |                         |       |  |
|               | enrofloxacin    | 93106-60-6  | ENR | $C_{19}H_{22}FN_3O_3$   | 359.4 |                                                                                       |
|               |                 |             |     |                         |       |  |
|               | sarafloxacin    | 98105-99-8  | SAR | $C_{20}H_{17}F_2N_3O_3$ | 385.4 |                                                                                       |
| tetracyclines | oxytetracycline | 79-57-2     | OTC | $C_{22}H_{24}N_2O_8$    | 460.4 |  |
|               | tetracycline    | 60-54-8     | TC  | $C_{22}H_{24}N_2O_8$    | 444.4 |  |

|            |                |            |     |                                                                |       |                                                                                       |
|------------|----------------|------------|-----|----------------------------------------------------------------|-------|---------------------------------------------------------------------------------------|
|            | doxycycline    | 564-25-0   | DC  | C <sub>22</sub> H <sub>24</sub> N <sub>2</sub> O <sub>8</sub>  | 444.4 | 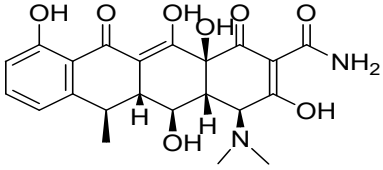   |
| macrolides | spiramycin     | 8025-81-8  | SPI | C <sub>43</sub> H <sub>74</sub> N <sub>2</sub> O <sub>14</sub> | 842.4 |    |
|            | tylosin        | 1401-69-0  | TYL | C <sub>46</sub> H <sub>77</sub> NO <sub>17</sub>               | 916.1 |    |
|            | erythromycin   | 114-07-8   | ERY | C <sub>37</sub> H <sub>67</sub> NO <sub>13</sub>               | 733.9 |  |
|            | clarithromycin | 81103-11-9 | CTM | C <sub>38</sub> H <sub>69</sub> NO <sub>13</sub>               | 748.0 |  |
|            | roxithromycin  | 80214-83-1 | ROX | C <sub>41</sub> H <sub>76</sub> N <sub>2</sub> O <sub>15</sub> | 837.0 |  |

|                      |                 |            |        |                           |       |                                                                                       |
|----------------------|-----------------|------------|--------|---------------------------|-------|---------------------------------------------------------------------------------------|
| chlorampheni<br>cols | leucomycin A3   | 16846-24-5 | LEU-A3 | $C_{42}H_{69}NO_{15}$     | 828.0 | 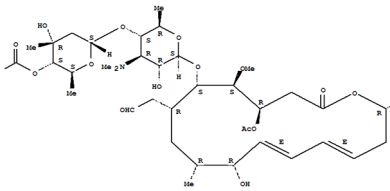   |
|                      | oleandomycin    | 3922-90-5  | ODM    | $C_{35}H_{61}NO_{12}$     | 687.9 |    |
|                      | florfenicol     | 73231-34-2 | FF     | $C_{12}H_{14}Cl_2FNO_4S$  | 358.2 |    |
|                      | chloramphenicol | 154-75-2   | CAP    | $C_{11}H_{12}Cl_2FN_2O_5$ | 323.1 |   |
|                      | monensin        | 17090-79-8 | MON    | $C_{36}H_{62}O_{11}$      | 670.9 |  |
|                      | salinomycin     | 53003-10-4 | SAL    | $C_{42}H_{70}O_{11}$      | 751   |  |
|                      | lincomycin      | 154-21-2   | LIN    | $C_{18}H_{34}N_2O_6S$     | 406.5 |  |

---

cloxacillin

61-72-3

CLOX

C<sub>19</sub>H<sub>18</sub>ClN<sub>3</sub>O<sub>5</sub>S

435.9

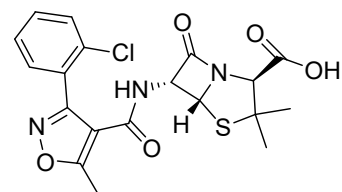

Table S2 The Optimum mass spectrum parameters for the antibiotics

| Analytes | Retention<br>Time (min) | Precursorion<br>(m/z) | Production<br>(m/z) | Fragmentor<br>(V) | Collision<br>energy<br>(eV) |
|----------|-------------------------|-----------------------|---------------------|-------------------|-----------------------------|
| SG       | 2.545                   | 215.1                 | 92.2*, 64.9         | 81                | 24, 44                      |
| SCT      | 1.057                   | 215.1                 | 156*, 92.2          | 72                | 24, 8                       |
| SD       | 3.655                   | 251.1                 | 92.2*, 156.1        | 107               | 24, 16                      |
| ST       | 4.746                   | 256.2                 | 156.1*, 92.2        | 106               | 11, 24                      |
| SPD      | 5.121                   | 250.1                 | 92.3*, 156.1        | 100               | 24, 14                      |
| SMR      | 5.621                   | 265.1                 | 91.9*, 156          | 91                | 24, 14                      |
| SM       | 7.128                   | 281.2                 | 91.9*, 108.1        | 100               | 34, 24                      |
| SMZ      | 7.183                   | 279.2                 | 186.3*, 124.2       | 106               | 14, 24                      |
| SCP      | 8.413                   | 285.2                 | 92.2*, 64.9         | 81                | 24, 44                      |
| SMM      | 8.508                   | 281.2                 | 91.9*, 155.8        | 121               | 34, 15                      |
| SMX      | 8.943                   | 254.4                 | 156*, 108.1         | 90                | 13, 21                      |
| SIZ      | 9.746                   | 268.2                 | 156.1*, 113         | 96                | 8, 14                       |
| ASMZ     | 10.513                  | 296.4                 | 133.9*, 73.2        | 106               | 19, 24                      |
| SDO      | 11.409                  | 311.1                 | 156.3*, 92.1        | 103               | 17, 26                      |
| SSS      | 9.44                    | 311.1                 | 156.3*, 92.2        | 112               | 18, 32                      |
| MAR      | 7.157                   | 363.2                 | 72.2*, 69.9         | 114               | 25, 37                      |
| FLE      | 7.449                   | 370.0                 | 326.2*, 269.1       | 145               | 20, 28                      |
| OFL      | 7.729                   | 362.2                 | 318.5*, 261.5       | 114               | 17, 25                      |
| NOR      | 7.771                   | 320.2                 | 302.2*, 275.6       | 123               | 17, 19                      |
| PEF      | 7.826                   | 334.1                 | 316.1*, 293.2       | 131               | 18, 11                      |
| CIP      | 8.064                   | 332.2                 | 314*, 288           | 124               | 17, 17                      |
| DAN      | 8.562                   | 358.2                 | 340*, 283.1         | 165               | 17, 20                      |
| ENR      | 8.69                    | 360.2                 | 342.4*, 316.3       | 119               | 19, 17                      |
| SAR      | 9.405                   | 386.3                 | 368.3*, 342.2       | 120               | 19, 17                      |
| OTC      | 7.653                   | 461.2                 | 426.5*, 201.1       | 119               | 17, 41                      |
| TC       | 7.974                   | 445.2                 | 410.4*, 428.6       | 111               | 17, 15                      |
| DC       | 11.246                  | 445.2                 | 428.1*, 154         | 134               | 17, 25                      |
| SPI      | 10.988                  | 843.6                 | 174*, 144.8         | 150               | 41, 36                      |
| TYL      | 14.373                  | 917.1                 | 173.8*, 100.5       | 190               | 41, 57                      |
| ERY      | 14.67                   | 716.5                 | 158.2*, 558         | 160               | 25, 25                      |
| CTM      | 15.2                    | 748.9                 | 158.1*, 590         | 180               | 24, 16                      |
| ROX      | 15.371                  | 838.1                 | 158.1*, 680.8       | 150               | 23, 19                      |
| LEU-A3   | 15.466                  | 828.6                 | 109.1*, 174.1       | 191               | 44, 36                      |
| ODM      | 13.198                  | 689.4                 | 158.2*, 545.9       | 127               | 34, 14                      |
| FF       | 3.037                   | 356                   | 336.1*, 185.1       | -90               | -4, -16                     |
| CAP      | 3.787                   | 356                   | 152.1*, 413.4       | -100              | -13, -56                    |
| MON      | 20.12                   | 693.4                 | 461.6*, 675.9       | 170               | 60, 40                      |
| SAL      | 20.426                  | 773.3                 | 431.3*, 413.4       | 160               | 55, 56                      |
| LIN      | 6.315                   | 407.5                 | 126.1*, 70.1        | 155               | 32, 72                      |

|            |        |       |               |      |         |
|------------|--------|-------|---------------|------|---------|
| CLOX       | 15.286 | 436.2 | 178.2*, 220.3 | 173  | 24, 14  |
| SMA-D4     | 7.109  | 283.1 | 124.1*, 186.1 | 109  | 24, 16  |
| SMX-D4     | 8.885  | 258.1 | 160.1*, 112   | 110  | 13, 21  |
| LIN-D3     | 6.317  | 410.6 | 129.1*, 73.1  | 170  | 36, 76  |
| THI-D4     | 6.315  | 206.1 | 179.1*, 135.1 | 130  | 25, 35  |
| TRI-D4     | 6.855  | 294.4 | 123*, 230     | 152  | 21, 21  |
| OFL-D3     | 7.714  | 366.3 | 322.5*, 261.6 | 103  | 18, 30  |
| ERY-13C,D3 | 15.228 | 720.6 | 162.2*, 562.2 | 162  | 25, 20  |
| CAP-D5     | 3.762  | 326.1 | 157.1*, 261.8 | -110 | -14, -6 |

---

\* The transitions were used for quantification.



Table S3 The limits of detection, recoveries, calibration curve and correlation coefficient of the method

| Analytes | Linearity<br>Range<br>(ng/mL) | LODs<br>(ng/L) | LOQs<br>(ng/L) | Spiked Concentration and Precision |                       |                  |                       |               |                       | Calibration curve     | r <sup>2</sup> | Internal<br>stanndard |
|----------|-------------------------------|----------------|----------------|------------------------------------|-----------------------|------------------|-----------------------|---------------|-----------------------|-----------------------|----------------|-----------------------|
|          |                               |                |                | 5<br>(ng/L)                        | RSD<br>(%)<br>(n = 3) | 50<br>(ng/<br>L) | RSD<br>(%)<br>(n = 3) | 100<br>(ng/L) | RSD<br>(%)<br>(n = 3) |                       |                |                       |
| SG       | 0.50 - 200                    | 0.058          | 0.193          | 74.5                               | 5.55                  | 72.8             | 4.09                  | 72.7          | 3.66                  | Y=0.496804X-0.001702  | 0.998          | SMA-D4                |
| SCT      | 0.50 - 200                    | 0.048          | 0.160          | 71.5                               | 11.8                  | 62.9             | 6.6                   | 62.1          | 3.57                  | Y=0.603164X-0.001988  | 0.998          | SMA-D4                |
| SD       | 0.50 - 200                    | 0.074          | 0.247          | 100                                | 18.5                  | 73.9             | 6.31                  | 71.3          | 5.39                  | Y=0.46659X-0.0006870  | 0.991          | SMA-D4                |
| ST       | 0.50 - 200                    | 0.057          | 0.190          | 105                                | 25.8                  | 87.5             | 19.8                  | 109           | 25.2                  | Y=0.322985X-0.002166  | 0.996          | SMA-D4                |
| SPD      | 0.50 - 200                    | 0.033          | 0.110          | 80.8                               | 16.9                  | 77.1             | 0.69                  | 78.2          | 1.3                   | Y=0.564652X+0.001209  | 0.998          | SMA-D4                |
| SMR      | 0.50 - 200                    | 0.034          | 0.113          | 85.3                               | 8.8                   | 84.7             | 4.45                  | 85.5          | 2.54                  | Y=0.333182X+0.000269  | 0.998          | SMA-D4                |
| SM       | 0.50 - 200                    | 0.042          | 0.140          | 99.2                               | 1.23                  | 102              | 20.1                  | 104           | 1.8                   | Y=0.527594X+0.009430  | 0.99           | SMA-D4                |
| SMZ      | 0.50 - 200                    | 0.024          | 0.080          | 90.5                               | 9.56                  | 122              | 0.75                  | 93.2          | 3.18                  | Y=0.499592X+0.003572  | 0.998          | SMA-D4                |
| SCP      | 1.00 - 200                    | 0.107          | 0.357          | 90.6                               | 12.9                  | 93.5             | 2.39                  | 85.4          | 4.69                  | Y=0.1694X-0.000837894 | 0.998          | SMA-D4                |
| SMM      | 0.50 - 200                    | 0.056          | 0.187          | 107                                | 18.6                  | 79.9             | 17.9                  | 127           | 12.7                  | Y=0.00538X+0.094610   | 0.998          | SMA-D4                |
| SMX      | 0.50 - 200                    | 0.069          | 0.230          | 120                                | 9.71                  | 93.6             | 15                    | 77            | 6.79                  | Y=0.175726X-0.001203  | 0.997          | SMX-D4                |
| SIZ      | 0.50 - 200                    | 0.08           | 0.267          | 83.3                               | 15.3                  | 68.5             | 14.2                  | 68.5          | 19.1                  | Y=0.192927X-0.003782  | 0.992          | SMA-D4                |
| ASMZ     | 1.00 - 200                    | 0.079          | 0.260          | 95.6                               | 10.9                  | 68.5             | 9.67                  | 117           | 3.69                  | Y=0.043806X-0.0005174 | 0.995          | SMA-D4                |
| SDO      | 0.50 - 200                    | 0.034          | 0.113          | 69                                 | 4.24                  | 94.7             | 3.85                  | 69            | 2.56                  | Y=1.119341X+0.009763  | 0.996          | SMA-D4                |
| SSS      | 0.50 - 200                    | 0.035          | 0.117          | 68                                 | 3.36                  | 101              | 19                    | 67.6          | 2.56                  | Y=0.014237X+0.12235   | 0.999          | SMA-D4                |
| MAR      | 1.00 - 200                    | 0.060          | 0.200          | 79                                 | 8.04                  | 99.7             | 7.62                  | 62.9          | 10.3                  | Y=3.806642X+0.020986  | 0.993          | OFL-D3                |
| FLE      | 1.00 - 200                    | 0.230          | 0.767          | 66.2                               | 13.1                  | 82.4             | 13.1                  | 72.7          | 6.26                  | Y=5.094687X-0.034279  | 0.999          | OFL-D3                |
| OFL      | 0.50 - 200                    | 0.164          | 0.547          | 83.4                               | 8.08                  | 96.6             | 21.3                  | 100           | 4.57                  | Y=4.910041X-0.028751  | 0.999          | OFL-D3                |
| NOR      | 1.00 - 200                    | 0.143          | 0.477          | 66                                 | 9.75                  | 75.8             | 14.7                  | 80.8          | 8.3                   | Y=0.470729X-0.033099  | 0.992          | OFL-D3                |
| PEF      | 1.00 - 200                    | 0.250          | 0.833          | 71.2                               | 2.46                  | 80.3             | 3.13                  | 149           | 13.9                  | Y=4.482062X-0.033436  | 0.999          | SAR-D8                |
| CIP      | 1.00 - 200                    | 0.133          | 0.443          | 64                                 | 19.4                  | 102              | 8.54                  | 77.9          | 2.72                  | Y=2.828346X-0.043408  | 0.994          | OFL-D3                |
| DAN      | 1.00 - 200                    | 0.182          | 0.607          | 99.3                               | 23.4                  | 75.7             | 10.2                  | 125           | 2.28                  | Y=1.488973X-0.013613  | 0.994          | SAR-D8                |
| ENR      | 1.00 - 200                    | 0.160          | 0.533          | 84.1                               | 5.26                  | 130              | 6.67                  | 80.3          | 6.93                  | Y=5.142616X-0.057320  | 0.998          | OFL-D3                |
| SAR      | 1.00 - 200                    | 0.270          | 0.900          | 88.7                               | 9.87                  | 73.7             | 5.06                  | 97.4          | 10                    | Y=5.458254X-0.069007  | 0.997          | SAR-D8                |
| OTC      | 1.00 - 200                    | 0.160          | 0.533          | 61                                 | 3.15                  | 124              | 20.3                  | 98.7          | 7.77                  | Y=0.029048X-0.000234  | 0.994          | TRI-D3                |
| TC       | 1.00 - 200                    | 0.032          | 0.107          | 77                                 | 16.1                  | 111              | 21.8                  | 72.9          | 14.1                  | Y=0.040243X+0.000210  | 0.992          | TRI-D3                |
| DC       | 1.00 - 200                    | 0.147          | 0.490          | 96.1                               | 14.9                  | 92.2             | 2.75                  | 83.6          | 10.5                  | Y=0.076058X-0.0007741 | 0.995          | TRI-D3                |
| SPI      | 1.00 - 200                    | 0.021          | 0.070          | 103                                | 14.9                  | 95.1             | 0.95                  | 83.6          | 10.5                  | Y=0.011336X-0.000160  | 0.995          | ERY-13<br>C-D3        |
| TYL      | 1.00 - 200                    | 0.007          | 0.023          | 100                                | 8.34                  | 90.5             | 0.95                  | 111           | 16.3                  | Y=0.042834X-0.000428  | 0.999          | ERY-13<br>C-D3        |
| ERY      | 1.00 - 200                    | 0.025          | 0.0803         | 131                                | 13.5                  | 118              | 18                    | 128           | 9.12                  | Y=0.062230X+0.000064  | 0.998          | ERY-13<br>C-D3        |
| CTM      | 1.00 - 200                    | 0.023          | 0.077          | 129                                | 21.6                  | 116              | 20.8                  | 93            | 12.1                  | Y=1.030182X+1.322590  | 0.998          | ERY-13<br>C-D3        |
| ROX      | 1.00 - 200                    | 0.033          | 0.110          | 119                                | 9.48                  | 109              | 10                    | 67.9          | 13.9                  | Y=0.074442X-0.000179  | 0.999          | ERY-13                |

|        |            |       |       |      |      |      |      |      |      |                       |       |                |
|--------|------------|-------|-------|------|------|------|------|------|------|-----------------------|-------|----------------|
|        |            |       |       |      |      |      |      |      |      |                       |       | C-D3           |
| LEU-A3 | 0.50 - 200 | 0.008 | 0.027 | 104  | 14.2 | 67.3 | 28.9 | 110  | 12.2 | Y=0.768968X+2.179457  | 0.998 | ERY-13<br>C-D3 |
| ODM    | 0.50 - 200 | 0.015 | 0.050 | 76.7 | 3.52 | 120  | 14.1 | 86.5 | 13.4 | Y=0.434659X+0.001054  | 0.997 | ERY-13<br>C-D3 |
| FF     | 0.50 - 200 | 0.002 | 0.007 | 96.7 | 13.3 | 90.9 | 7.45 | 83.7 | 6.02 | Y=1.664007X+0.001819  | 0.999 | CAP-D5         |
| CAP    | 0.50 - 200 | 0.055 | 0.183 | 93.1 | 14.9 | 83.9 | 27   | 79   | 2.97 | Y=0.867775X+0.001819  | 0.999 | CAP-D5         |
| MON    | 0.50 - 200 | 0.011 | 0.037 | 94   | 8.3  | 94.5 | 10.3 | 93.3 | 13.3 | Y=0.139559X+0.000242  | 0.999 | THI-D4         |
| SAL    | 1.00 - 200 | 0.151 | 0.503 | 82.2 | 21   | 74.6 | 5.53 | 81.8 | 8.36 | Y=0.153363X+0.000929  | 0.996 | THI-D4         |
| LIN    | 0.50 - 200 | 0.018 | 0.060 | 126  | 32   | 86.5 | 5.76 | 91.7 | 10.9 | Y=0.565537X-0.0000820 | 0.999 | LIN-D3         |
| CLOX   | 1.00 - 200 | 0.134 | 0.447 | 72.2 | 19.2 | 78.3 | 4.09 | 81.4 | 10.8 | Y=0.047691X-0.0000675 | 0.998 | THI-D4         |

---

Table S4 The concentration, detection rate and spatial coefficient of variation of antibiotics in the aquatic environment of the wetland Caohai

| Compound                     | Frequency(%) | Concentration (ng/L) |         |         |         | The attenuation<br>rate* (%) | LogKOW  |
|------------------------------|--------------|----------------------|---------|---------|---------|------------------------------|---------|
|                              |              | Median               | Minimum | Maximum | Average |                              |         |
|                              |              | value                | value   | value   | value   |                              |         |
| Sufaguanidine (SG)           | 25.0         | ND                   | 0.45    | 1.80    | 0.30    | -100                         | -1.0716 |
| Sulfacetamide (SCT)          | 0.00         | ND                   | 0.00    | ND      | ND      | -                            | -0.6044 |
| Sulfadiazine (SD)            | 70.0         | 0.70                 | 0.24    | 13.7    | 1.80    | -88.0                        | -0.3377 |
| Sulfathiazole (ST)           | 0.00         | ND                   | 0.00    | ND      | ND      | -                            | 0.7151  |
| Sulfapyridine (SPD)          | 5.00         | ND                   | 2.33    | 2.30    | 0.10    | -100                         | 0.5266  |
| Sulfamerazine (SMR)          | 0.00         | ND                   | 0.00    | ND      | ND      | -                            | 0.2096  |
| Sulfameter (SM)              | 0.00         | ND                   | 0.00    | ND      | ND      | -                            | -0.2568 |
| Sulfamethazine (SMZ)         | 25.0         | ND                   | 0.96    | 24.0    | 1.70    | -95.5                        | 0.7569  |
| Sulfachloropyridazine (SCP)  | 0.00         | ND                   | 0.00    | ND      | ND      | -                            | 0.3068  |
| Sulfamonomethoxine (SMM)     | 35.0         | ND                   | 0.00    | 4.30    | 0.50    | -93.7                        | 0.1981  |
| Sulfamethoxazole (SMX)       | 80.0         | 3.00                 | 0.39    | 201     | 23.3    | -95.1                        | 0.484   |
| Sulfisoxazole (SIZ)          | 40.0         | ND                   | 0.23    | 1.00    | 0.20    | 63.1                         | 1.0313  |
| Acetylsulfamethoxazole(ASMZ) | 95.0         | 2.80                 | 0.36    | 101     | 11.7    | -90.9                        | 1.2077  |
| Sulfadoxine (SDO)            | 0.00         | ND                   | 0.00    | ND      | ND      | -                            | -0.2378 |
| Sulfadimethoxine (SSS)       | 0.00         | ND                   | 0.00    | ND      | ND      | -                            | 1.1745  |
| Marbofloxacin (MAR)          | 0.00         | ND                   | 0.00    | ND      | ND      | -                            | 0.57620 |
| Fleroxacin (FLE)             | 40.0         | ND                   | 0.32    | 6.00    | 0.60    | -                            | 0.0463  |
| Ofloxacin (OFL)              | 50.0         | 0.30                 | 0.63    | 17.9    | 2.80    | -90.6                        | -0.1998 |
| Norfloxacin (NOR)            | 95.0         | 5.90                 | 1.39    | 90.5    | 14.9    | -21.1                        | -0.306  |
| Pefloxacin (PEF)             | 90.0         | 5.70                 | 1.35    | 93.0    | 12.8    | 113                          | -0.0948 |
| Ciprofloxacin (CIP)          | 100          | 2.20                 | 0.45    | 21.5    | 4.30    | -17.6                        | -0.0008 |
| Danofloxacin (DAN)           | 90.0         | 3.60                 | 0.55    | 62.8    | 10.0    | 85.8                         | 0.4421  |
| Enrofloxacin (ENR)           | 80.0         | 0.90                 | 0.59    | 30.0    | 3.00    | 139                          | 0.7015  |

|                        |      |      |      |      |      |       |         |
|------------------------|------|------|------|------|------|-------|---------|
| Sarafloxacin (SAR)     | 75.0 | 0.90 | 0.49 | 80.8 | 6.60 | 68.3  | 1.0713  |
| Oxytercycline (OTC)    | 100  | 2.60 | 0.79 | 81.8 | 7.00 | -79.7 | -2.8669 |
| Tetracycline (TC)      | 40.0 | ND   | 3.09 | 27.8 | 3.20 | -77.2 | -1.3286 |
| Doxycycline (DC)       | 50.0 | 0.30 | 0.60 | 1.90 | 0.60 | 79.3  | -1.3645 |
| Spiramycin (SPI)       | 0.00 | ND   | 0.00 | ND   | ND   | -     | 1.8735  |
| Tylosin (TYL)          | 40.0 | ND   | 1.07 | 17.5 | 2.90 | -44.4 | 1.0496  |
| Erythromycin (ERY)     | 80.0 | 10.7 | 1.36 | 209  | 34.6 | -95.6 | 4.3405  |
| Clarithromycin (CTM)   | 40.0 | ND   | 0.47 | 11.1 | 1.70 | -95.9 | 3.1776  |
| Roxithromycin (ROX)    | 70.0 | 2.40 | 0.60 | 50.3 | 7.80 | -95.9 | 2.7508  |
| Leucomycin A3 (LEU-A3) | 0.00 | ND   | 0.00 | ND   | ND   | -     | 3.1591  |
| Oleanolomycin (ODM)    | 0.00 | ND   | 0.00 | ND   | ND   |       | 1.8319  |
| Florfenicol (FF)       | 95.0 | 0.50 | 0.00 | 34.2 | 3.30 | -89.8 | -0.0365 |
| Chloramphenicol (CAP)  | 60.0 | 0.60 | 0.00 | 4.40 | 0.90 | -49.8 | 0.916   |
| Monensin(MON)          | 0.00 | ND   | 0.00 | ND   | ND   | -     | 5.4325  |
| Salinomycin(SAL)       | 0.00 | ND   | 0.46 | ND   | ND   | -     | 8.5263  |
| Lincomycin(LIN)        | 85.0 | 4.40 | 0.22 | 216  | 29.5 | 94.3  | 0.2884  |
| Cloxacillin(CLOX)      | 80.0 | 1.00 | 0.17 | 9.00 | 2.20 | 70    | 3.2181  |

The attenuation rate(%) was calculated by  $(C_{\text{Group 3}} - C_{\text{Group 1}}) / C_{\text{Group 1}} * 100\%$ ,  $C_{\text{Group 1}}$  and  $C_{\text{Group 3}}$  represents the average total concentration of antibiotics in Group 1 and Group 3, respectively. “-” represents the average total concentration of antibiotics in Group 3 was lower than that of Group 1.

Table S5 Toxicity data of 21 antibiotics to algae

| antibiotics | Tested species               | Toxicity          |               | Assessment factor | PNEC/(ng/L) | Reference |
|-------------|------------------------------|-------------------|---------------|-------------------|-------------|-----------|
|             |                              | data /<br>( mg/L) | Toxicity type |                   |             |           |
| SMX         | selenastrum<br>capricornutum | 1.53              | acute         | 1000              | 1530        | [71]      |
| SD          | selenastrum<br>capricornutum | 2.19              | acute         | 1000              | 2190        | [71]      |
| OTC         | selenastrum<br>capricornutum | 0.342             | acute         | 1000              | 342         | [72]      |

|     |                                   |        |       |      |       |      |
|-----|-----------------------------------|--------|-------|------|-------|------|
| ERY | selenastrum<br>capricornutum      | 0.0366 | acute | 1000 | 36.6  | [72] |
| TYL | selenastrum<br>capricornutum      | 0.411  | acute | 1000 | 411   | [71] |
| CIP | M.aeruginosa                      | 0.017  | acute | 1000 | 17    | [73] |
| OFL | M.aeruginosa                      | 0.021  | acute | 1000 | 21    | [73] |
| ENR | M.aeruginosa                      | 0.049  | acute | 1000 | 49    | [74] |
| LIN | Pseudokichneriella<br>subcapitata | 0.07   | acute | 1000 | 70    | [72] |
| CTM | Pseudokichneriella<br>subcapitata | 0.002  | acute | 1000 | 2     | [72] |
| TC  | Pseudokichneriella<br>subcapitata | 3.31   | acute | 1000 | 3310  | [75] |
| SMZ | S.vacuolatus                      | 19.52  | acute | 1000 | 19520 | [73] |
| SPD | Lemna minor                       | 0.46   | acute | 1000 | 460   | [73] |
| NOR | Microcystis<br>aeruginosa         | 0.0485 | acute | 1000 | 48.5  | [26] |
| ROX | Green algae                       | 0.0046 | acute | 1000 | 4.6   | [76] |
| FF  | chlorella pyenoidosa              | 12.3   | acute | 1000 | 12300 | [77] |
| CAP | chlorella pyenoidosa              | 28.66  | acute | 1000 | 28660 | [77] |
| SAR | Microcystis<br>aeruginosa         | 0.015  | acute | 1000 | 15    | [78] |
| SG  | Scenedesmus<br>vacuolatus         | 3.42   | acute | 1000 | 3420  | [73] |
| SIZ | Scenedesmus<br>vacuolatus         | 11.9   | acute | 1000 | 11900 | [73] |
| DC  | Lemna gibba                       | 1.844  | acute | 1000 | 1844  | [79] |

---

Table S6 The RQs of each sampling point at Caohai wetland

| Compounds | SG   | SD   | SPD  | SMZ  | SMX  | SIZ  | 0FL  | NOR  | CIP  | ENR  | SAR  | OTC  | TC   | DC   | TYL  | ERY  | CTM  | ROX   | LIN  | FF   | CAP  |
|-----------|------|------|------|------|------|------|------|------|------|------|------|------|------|------|------|------|------|-------|------|------|------|
| S1        | 0.00 | 0.00 | 0.00 | 0.00 | 0.13 | 0.00 | 0.75 | 0.00 | 0.09 | 0.05 | 0.00 | 0.01 | 0.00 | 0.00 | 0.00 | 5.06 | 4.54 | 3.58  | 2.16 | 0.00 | 0.00 |
| S2        | 0.00 | 0.00 | 0.00 | 0.00 | 0.00 | 0.00 | 0.27 | 0.13 | 0.23 | 0.00 | 0.08 | 0.02 | 0.00 | 0.00 | 0.00 | 0.44 | 0.31 | 0.83  | 0.15 | 0.00 | 0.00 |
| S3        | 0.00 | 0.01 | 0.01 | 0.00 | 0.12 | 0.00 | 0.31 | 0.03 | 0.39 | 0.00 | 0.06 | 0.24 | 0.01 | 0.00 | 0.00 | 5.71 | 5.53 | 10.94 | 3.09 | 0.00 | 0.00 |
| S4        | 0.00 | 0.00 | 0.00 | 0.00 | 0.00 | 0.00 | 0.03 | 0.44 | 0.06 | 0.05 | 0.14 | 0.00 | 0.00 | 0.00 | 0.01 | 1.23 | 0.98 | 2.57  | 0.55 | 0.00 | 0.00 |
| S5        | 0.00 | 0.00 | 0.00 | 0.00 | 0.00 | 0.00 | 0.00 | 0.15 | 0.16 | 0.02 | 0.00 | 0.00 | 0.00 | 0.00 | 0.04 | 0.77 | 0.24 | 0.50  | 0.46 | 0.00 | 0.00 |
| S6        | 0.00 | 0.00 | 0.00 | 0.00 | 0.01 | 0.00 | 0.00 | 0.05 | 0.12 | 0.01 | 0.03 | 0.01 | 0.00 | 0.00 | 0.00 | 1.74 | 1.64 | 4.26  | 0.84 | 0.00 | 0.00 |
| S7        | 0.00 | 0.00 | 0.00 | 0.00 | 0.00 | 0.00 | 0.15 | 1.62 | 0.96 | 0.07 | 5.39 | 0.00 | 0.00 | 0.00 | 0.02 | 0.32 | 0.00 | 0.56  | 0.05 | 0.00 | 0.00 |
| S8        | 0.00 | 0.00 | 0.00 | 0.00 | 0.00 | 0.00 | 0.07 | 0.19 | 0.08 | 0.07 | 0.32 | 0.01 | 0.00 | 0.00 | 0.00 | 0.17 | 0.00 | 0.14  | 0.04 | 0.00 | 0.00 |
| S9        | 0.00 | 0.00 | 0.00 | 0.00 | 0.00 | 0.00 | 0.85 | 1.87 | 1.26 | 0.61 | 2.02 | 0.00 | 0.00 | 0.00 | 0.04 | 0.16 | 0.00 | 0.00  | 0.06 | 0.00 | 0.00 |
| S10       | 0.00 | 0.00 | 0.00 | 0.00 | 0.00 | 0.00 | 0.00 | 0.19 | 0.03 | 0.00 | 0.11 | 0.02 | 0.00 | 0.00 | 0.00 | 0.21 | 0.00 | 0.77  | 0.06 | 0.00 | 0.00 |
| S11       | 0.00 | 0.00 | 0.00 | 0.00 | 0.00 | 0.00 | 0.00 | 0.27 | 0.31 | 0.02 | 0.05 | 0.01 | 0.00 | 0.00 | 0.00 | 0.26 | 0.00 | 0.38  | 0.06 | 0.00 | 0.00 |
| S12       | 0.00 | 0.00 | 0.00 | 0.00 | 0.01 | 0.00 | 0.00 | 0.11 | 0.03 | 0.01 | 0.04 | 0.01 | 0.00 | 0.00 | 0.00 | 0.40 | 0.00 | 2.22  | 0.04 | 0.00 | 0.00 |
| S13       | 0.00 | 0.00 | 0.00 | 0.00 | 0.00 | 0.00 | 0.00 | 0.03 | 0.46 | 0.02 | 0.00 | 0.00 | 0.00 | 0.00 | 0.00 | 0.00 | 0.00 | 0.00  | 0.00 | 0.00 | 0.00 |
| S14       | 0.00 | 0.00 | 0.00 | 0.00 | 0.00 | 0.00 | 0.00 | 0.05 | 0.04 | 0.01 | 0.00 | 0.02 | 0.00 | 0.00 | 0.00 | 0.06 | 0.00 | 0.00  | 0.03 | 0.00 | 0.00 |

|                   |      |      |      |      |      |      |      |      |      |      |      |      |      |      |      |      |      |      |      |      |      |
|-------------------|------|------|------|------|------|------|------|------|------|------|------|------|------|------|------|------|------|------|------|------|------|
| S15               | 0.00 | 0.00 | 0.00 | 0.00 | 0.00 | 0.00 | 0.00 | 0.09 | 0.11 | 0.01 | 0.20 | 0.01 | 0.00 | 0.00 | 0.00 | 0.00 | 0.13 | 0.00 | 0.00 | 0.00 |      |
| S16               | 0.00 | 0.00 | 0.00 | 0.00 | 0.01 | 0.00 | 0.06 | 0.11 | 0.03 | 0.01 | 0.05 | 0.01 | 0.00 | 0.00 | 0.02 | 0.45 | 0.45 | 0.64 | 0.29 | 0.00 | 0.00 |
| S17               | 0.00 | 0.00 | 0.00 | 0.00 | 0.00 | 0.00 | 0.05 | 0.18 | 0.15 | 0.04 | 0.06 | 0.01 | 0.00 | 0.00 | 0.00 | 0.00 | 0.00 | 0.00 | 0.00 | 0.00 | 0.00 |
| S18               | 0.00 | 0.00 | 0.00 | 0.00 | 0.00 | 0.00 | 0.00 | 0.09 | 0.39 | 0.16 | 0.12 | 0.01 | 0.00 | 0.00 | 0.00 | 0.04 | 0.00 | 0.00 | 0.02 | 0.00 | 0.00 |
| S19               | 0.00 | 0.00 | 0.00 | 0.00 | 0.01 | 0.00 | 0.09 | 0.48 | 0.14 | 0.06 | 0.09 | 0.01 | 0.00 | 0.00 | 0.01 | 1.90 | 3.29 | 6.31 | 0.50 | 0.00 | 0.00 |
| S20               | 0.00 | 0.00 | 0.00 | 0.00 | 0.00 | 0.00 | 0.00 | 0.08 | 0.04 | 0.00 | 0.00 | 0.01 | 0.00 | 0.00 | 0.00 | 0.00 | 0.00 | 0.00 | 0.00 | 0.00 | 0.00 |
| RQ <sub>sum</sub> | 16.3 | 2.45 | 26.4 | 6.07 | 2.34 | 8.72 | 9.13 | 1.09 | 6.89 | 1.41 | 1.37 | 2.86 | 0.51 | 0.22 | 0.55 | 2.11 | 0.50 | 0.83 | 12.9 | 0.13 | 103  |

Table S7 MRQ for the antibiotics in wetland Caohai

| Sampling points | MRQ  | Group* |
|-----------------|------|--------|
| S1              | 16.4 | 1      |
| S2              | 2.46 | 1      |
| S3              | 26.4 | 1      |
| S4              | 6.07 | 1      |
| S5              | 2.34 | 1      |
| S6              | 8.72 | 1      |
| S7              | 9.13 | 2      |
| S8              | 1.09 | 2      |
| S9              | 6.89 | 2      |
| S10             | 1.41 | 2      |
| S11             | 1.37 | 2      |
| S12             | 2.86 | 2      |
| S13             | 0.51 | 3      |
| S14             | 0.22 | 3      |
| S15             | 0.55 | 3      |

|     |      |   |
|-----|------|---|
| S16 | 2.11 | 3 |
| S17 | 0.49 | 3 |
| S18 | 0.82 | 3 |
| S19 | 12.9 | 3 |
| S20 | 0.12 | 2 |

---

\*It was introduced in the main text Part 2.2. Here Group 1 represents “Upstream of Wetland Caohai”; Group 2 represents “Medium stream of Wetland Caohai”; Group 3 represents “Downstream of Wetland Caohai”.



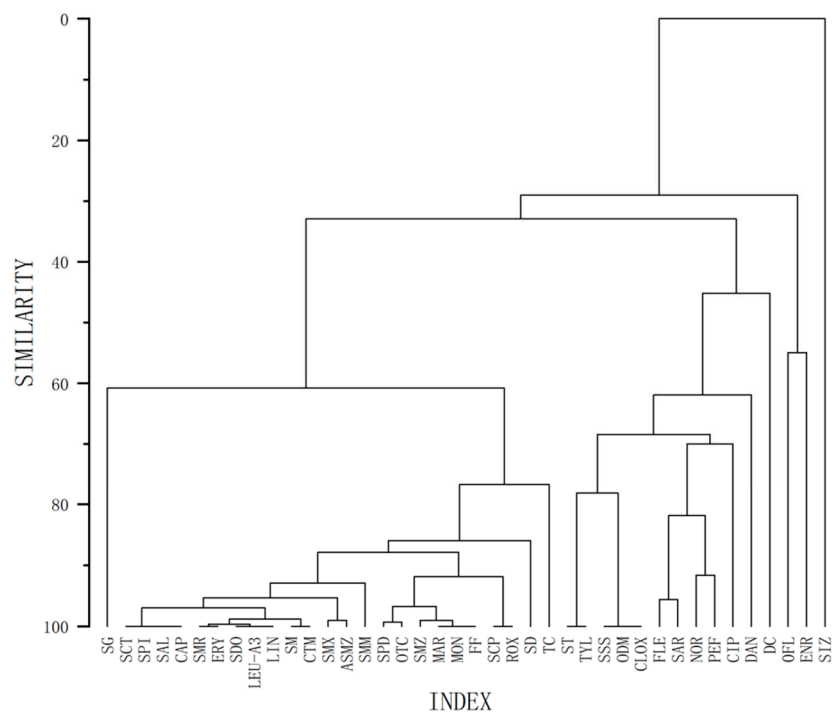

Figure S1 The cluster analysis of the detected antibiotics in wetland Caohai

## Reference

- Bialk, Bielinska., Stolte, S., Arning, J., Uebers, U., Boschen, A., Stepnowski, P., Matzke, M., 2011. Ecotoxicity evaluation of selected sulfonamides. *Chemosphere.*, 85(6):928-933.
- Brain, R.A., Johnson, D.J., Richards, S.M., Sanderson, H., Sibley, P.K., Solomon, K.R., 2004. Effects of 25 pharmaceutical compounds to *Lemna gibba* using a seven-day static-renewal test. *Environmental Toxicology & Chemistry.*, 23(2):371-382.
- H. C. Holten Lützhft., Halling, S.R.B., Rgensen, S.E., 1999. Algal Toxicity of Antibacterial Agents Applied in Danish Fish Farming. *Archives of environmental contamination and toxicology.*, 36(1):1-6.
- Eguchi, K., Nagase, H., Ozawa, M., Endoh, Y.S., Goto, K., Hirata, K., Yoshimura, H., 2004. Evaluation of antimicrobial agents for veterinary use in the ecotoxicity test using microalgae., *Chemosphere.*, 57(11):1733-1738.
- Gao, L.H., Shi, Y.L., Li, W.H., Liu, J.M., Cai, Y.Q., 2012. Occurrence, distribution and bioaccumulation of antibiotics in the Haihe River in China. *Journal of Environmental Monitoring.*, 14(4):1248-1256.
- Isidori, M., Lavorgna, M., Nardelli, A., Pascarella, L., Parrella, A., 2005. Toxic and genotoxic evaluation of six antibiotics on non-target organisms. *Science of the Total Environment.*, 346(1-3):87-98.
- Jiang, L., Hu, X., Yin, D., Zhang, H., Yu, Z., 2011. Occurrence, distribution and seasonal variation of antibiotics in the Huangpu River, Shanghai, China. *Chemosphere.*, 82(6):822-828.
- Li, X., Chen, J.F., Lv, S.H., Chen, J.Y., 2012. Growth inhibition effect of phenicol antibiotics on *Chlorellapyenoidosa*. *Journal of Jinan university.*, 33(3):294-299.
- Luo, L.C., Qin, B.Q., 2008. *Hydrodynamics and Its Effects on the Aquatic Ecosystem. Lake Taihu, China.* 2008.
- Lei, X., Lu, J., Liu, Z., Tong, Y., Li, S., 2015. Concentration and distribution of antibiotics in water-sediment system of Bosten Lake, Xinjiang. *Environmental*

science and pollution research international., 22(3):1670-1678.

- Robinson, A.A., Belden, J.B., Lydy, M.J., 2005. Toxicity of fluoroquinolone antibiotics to aquatic organisms. *Environmental Toxicology and Chemistry.*, 24(2):423-430.
- Tamtam, F., Mercier, F., Lebot, B., Eurin, J., Tuc, D.Q., Clement, M., Chevreuil M., 2008 Occurrence and fate of antibiotics in the Seine River in various hydrological conditions. *Science of the Total Environment.*, 393(1):84-95.
- Tang, J., Shi, T., Wu, X., Cao, H., Li, X., Hua, R., Yue, Y., 2015. The occurrence and distribution of antibiotics in Lake Chaohu, China: seasonal variation, potential source and risk assessment. *Chemosphere.*, 122:154-161.
- Watanabe, N., Bergamaschi, B.A., Loftin, K.A., Meyer, M.T., Harter, T., 2010. Use and environmental occurrence of antibiotics in freestall dairy farms with manured forage fields. *Environmental Science & Technology.*, 44(17):6591-6600.
- Wei, H., Wang, J.W., Yang, X.Y., Sun, B.C., Li, K.B., Zhang, J.T., 2017. Contamination characteristic and ecological risk of antibiotics in surface water of the Weihe Guanzhong section. *China Environmental Science*, 37(6):2255-2262.
- Xu, W.H., Zhang, G., Zou, S.C., Li, X., Liu, Y., 2007. Determination of selected antibiotics in the Victoria Harbour and the Pearl River, South China using high-performance liquid chromatography-electrospray ionization tandem mass spectrometry. *Environmental Pollution*, 145(3):672-679.
- Xu, W, Zhang, G, Zou, S., Ling, Z., Wang, G., Yan, W., 2009. A preliminary investigation on the occurrence and distribution of antibiotics in the Yellow River and its tributaries, China. *Water Environment Research.*, 81(3):248-254.
- Xue, B., Zhang, R., Wang, Y., Liu, X., Li, J., Zhang, G., 2013. Antibiotic contamination in a typical developing city in south China: Occurrence and ecological risks in the Yongjiang River impacted by tributary discharge and anthropogenic activities. *Ecotoxicol Environ Saf.*, 92(3):229-236.
- Yang, L.H., Ying, G.G., Su, H.C., Stauber, J.L., Aams, M.S., Binet, M.T., 2008. Growth-inhibiting effects of 12 antibacterial agents and their mixtures on the

freshwater microalga *Pseudokirchneriella subcapitata*. *Environmental Toxicology & Chemistry*, 27(5):1201-1208.

Zhang, Q., Xin, Q., Zhu, J.M., Cheng, J.P., 2013. The antibiotic contaminations in the main water bodies in China and the associated environmental and human health impacts. *Environmental chemistry*, 33(7):1075-1083.

Zhang, X.J., Bo, Y.W., Zhang, Y., Ma, S.Q., Guo, C.S., Zhang, L., 2017. Occurrence, distribution, and ecological risk of antibiotics in surface water in the Liaohe River Basin, China. *Environmental Science*, 38(11):4553-4561.

Zhou, L.J., Wu, Q.L., Zhao, Y.G., Zhang, B.B., 2016. Occurrence, spatiotemporal distribution, mass balance and ecological risks of antibiotics in the subtropical shallow Lake Taihu, China. *Environmental Science: Processes and Impacts*, 18(4):500-513.

Zuccato, E., Castiglioni, S., Bagnati, R., Melis, M., Fanelli, R., 2010. Source, occurrence and fate of antibiotics in the Italian aquatic environment. *Journal of Hazardous Materials*, 179(1):1042-1048.
